# Supplementary material
Source: publisher figshare collection journal article supplement (https://frontiersin.figshare.com/ndownloader/files/24170885)
Supplement: Supplementary file [file 24170885]

# Supplement 8

## Movie

### **S8 Movie. SR101 Excretion in control MO zfl**

SR101 excretion assay as described before (Figure 5). Movie shows excretion of SR101 (red fluorescent dye) from the cloaca and gut peristalsis in control MO zfl at five days post fertilization.
